# Supplementary material for: Dissociation mechanism of lithium salt by BaTiO3 with spontaneous polarization
Source: Royal Society of Chemistry journal article supplement (doi:10.1039/d4ee00798k), 2024-01-01
Supplement: d4ee00798k1.pdf [file d4ee00798k1.pdf]

## Dissociation mechanism of lithium salt by BaTiO<sub>3</sub> with spontaneous polarization

Shaoke Guo<sup>a,b,f</sup>, Shendong Tan<sup>a,b,f</sup>, Jiabin Ma<sup>a,b</sup>, Likun Chen<sup>a,b</sup>, Ke Yang<sup>a,b</sup>, Qiannan Zhu<sup>a,b</sup>, Yuetao Ma<sup>a,b</sup>, Peiran Shi<sup>a,b</sup>, Yiping Wei<sup>a,b</sup>, Xufei An<sup>a,b</sup>, Qingkang Ren<sup>c</sup>, Yanfei Huang<sup>d</sup>, Yingman Zhu<sup>a</sup>, Ye Cheng<sup>a,b</sup>, Wei Lv<sup>a</sup>, Tingzheng Hou<sup>a\*</sup>, Ming Liu<sup>a\*</sup>, Yan-Bing He<sup>a\*</sup>, Quan-Hong Yang<sup>e</sup>, Feiyu Kang<sup>a,b\*</sup>

*a* Shenzhen All-Solid-State Lithium Battery Electrolyte Engineering Research Center, Institute of Materials Research (IMR), Tsinghua Shenzhen International Graduate School, Tsinghua University, Shenzhen 518055, China.

*b*. School of Materials Science and Engineering, Tsinghua University, Beijing, 100084, China.

*c*. College of Mechatronics and Control Engineering, Shenzhen University, Shenzhen, China.

*d*. College of Materials Science and Engineering, Shenzhen University, Shenzhen, China.

*e*. School of Chemical Engineering and Technology, Tianjin University, Tianjin 300072, P. R. China

*f*. These authors contributed equally: Shaoke Guo, Shendong Tan.

Correspondence and requests for materials should be addressed to Y.-B. H. (email: [tingzhenghou@sz.tsinghua.edu.cn](mailto:tingzhenghou@sz.tsinghua.edu.cn), [liuming@sz.tsinghua.edu.cn](mailto:liuming@sz.tsinghua.edu.cn), [he.yanbing@sz.tsinghua.edu.cn](mailto:he.yanbing@sz.tsinghua.edu.cn), [fykang@sz.tsinghua.edu.cn](mailto:fykang@sz.tsinghua.edu.cn))

## Supplementary Figures

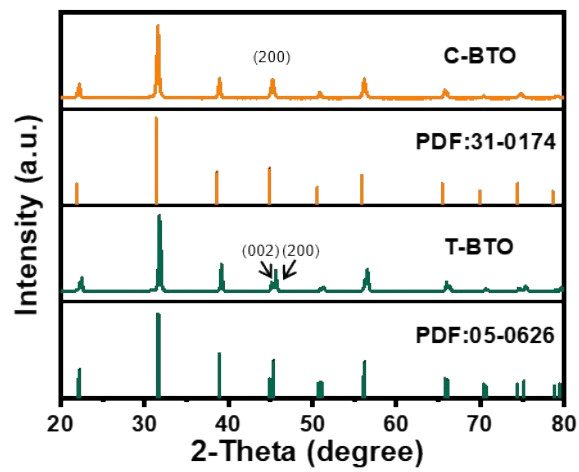

**Fig. S1** The XRD patterns of C-BTO and T-BTO.

**a**

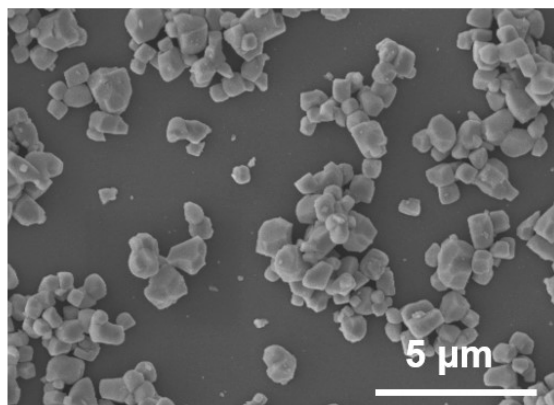

**b**

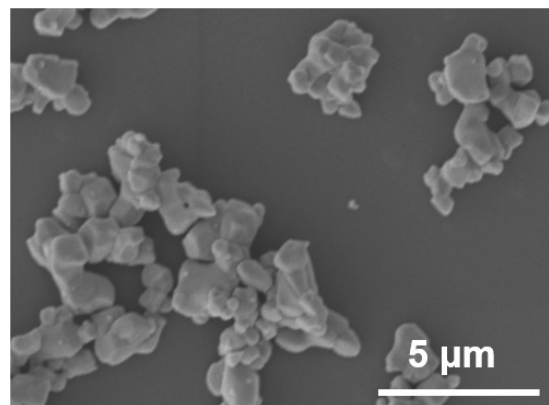

**Fig. S2** Scanning electron microscopy (SEM) images of a) C-BTO and b) T-BTO particles.

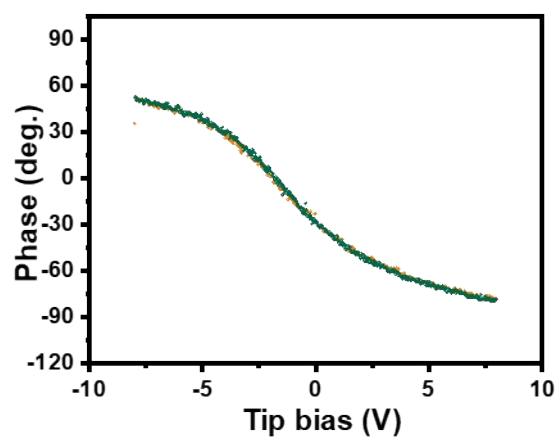

**Fig. S3** Hysteresis loop of PVDF obtained from PFM analysis.

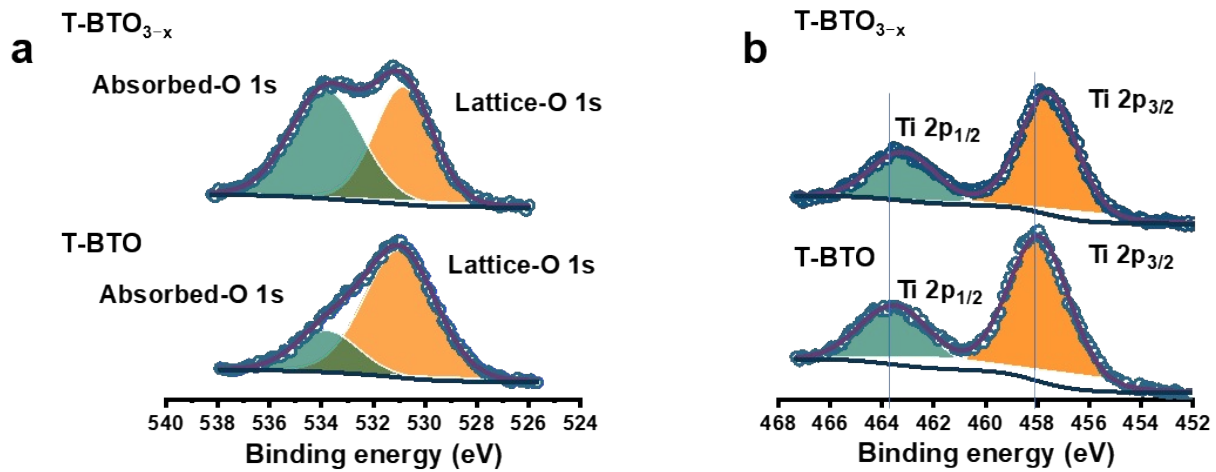

**Fig. S4** The a) O 1s XPS spectroscopy of T-BTO and T-BTO<sub>3-x</sub> and b) Ti 2p<sub>1/2</sub> and 2p<sub>3/2</sub> XPS spectroscopy of T-BTO and T-BTO<sub>3-x</sub>.

**a**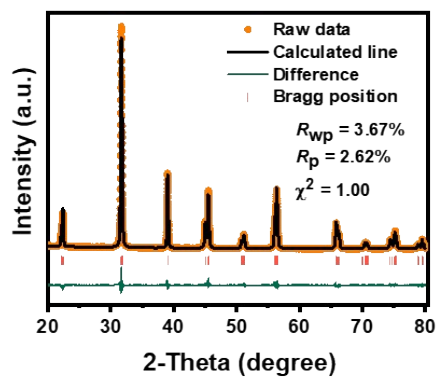**b**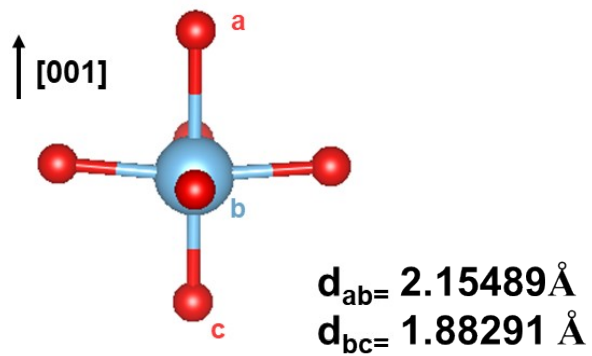

**Fig. S5.** a) The XRD refinement of T-BTO and b) the illustration of  $\text{Ti}^{4+}$  deviation.

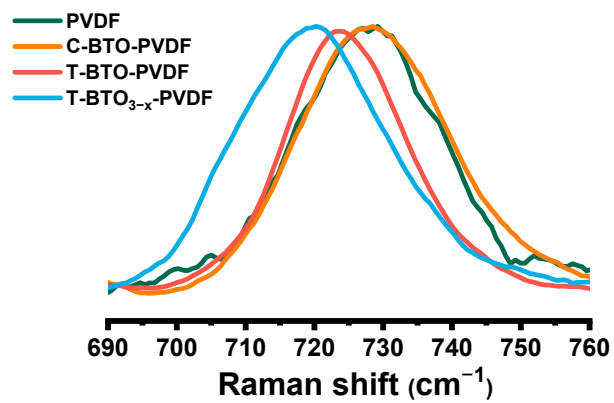

**Fig. S6** Raman spectra of PVDF, C-BTO-PVDF, T-BTO-PVDF and T-BTO<sub>3-x</sub>-PVDF.

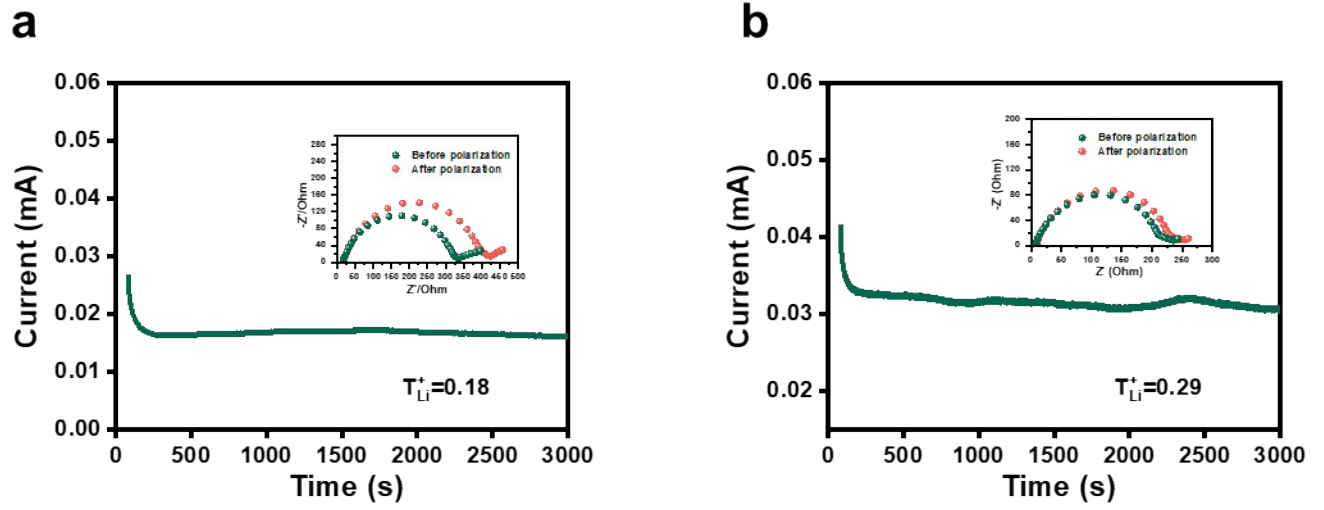

**Fig. S7** Current-time profiles of Li||Li symmetric batteries using a) PVDF and b) T-BTO-PVDF electrolytes.



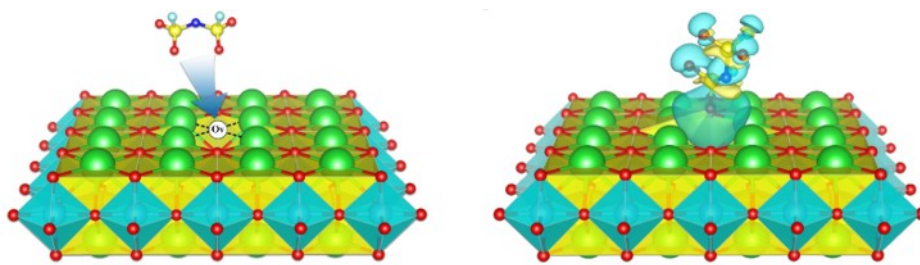

**Fig. S8** Simulation of the OVs' adsorption effect on FSI<sup>-</sup>.

**a**

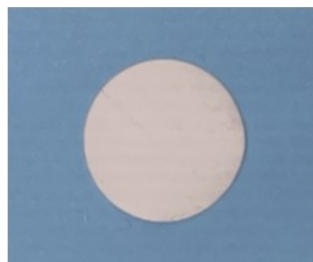

**b**

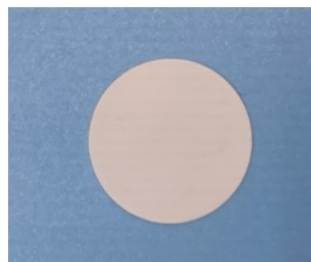

**Fig. S9** Optical images of a) PVDF and b) T-BTO<sub>3-x</sub>-PVDF electrolytes.

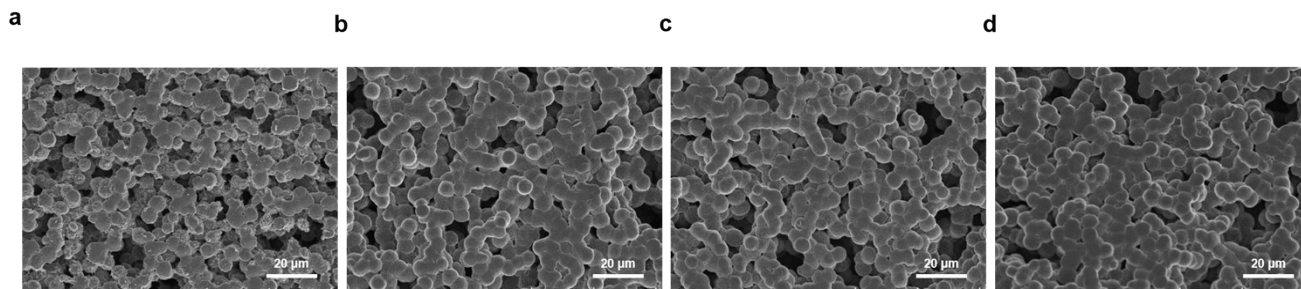

**Fig. S10** The SEM images of the surface of a) PVDF, b) C-BTO-PVDF, c) T-BTO-PVDF and d) T-BTO<sub>3-x</sub>-PVDF.

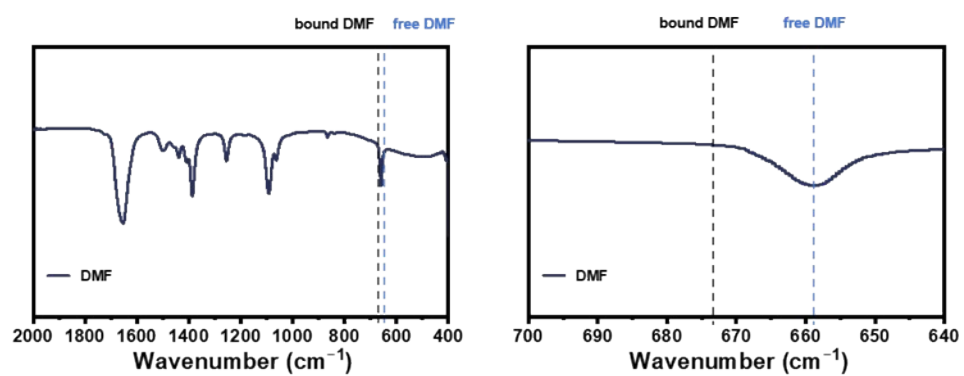

**Fig. S11** FTIR spectra of DMF in the range of a) 400–2000  $\text{cm}^{-1}$  and b) 640–700  $\text{cm}^{-1}$ .

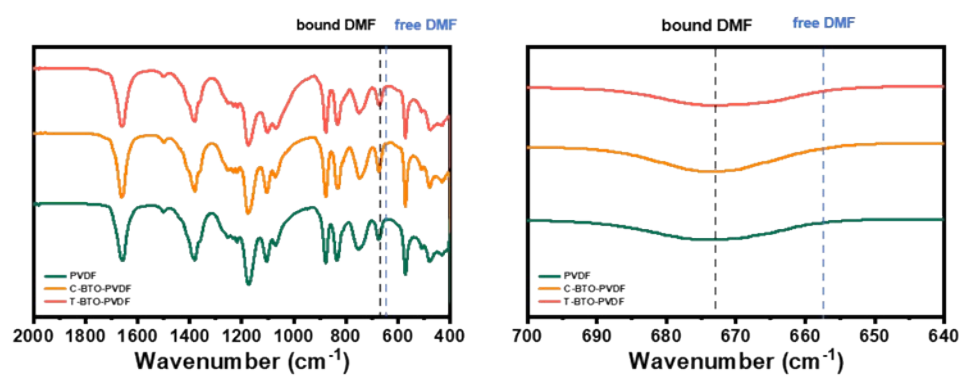

**Fig. S12** FTIR spectra of DMF in PVDF-based electrolytes in the range of a) 400–2000  $\text{cm}^{-1}$  and b) 640–700  $\text{cm}^{-1}$ .

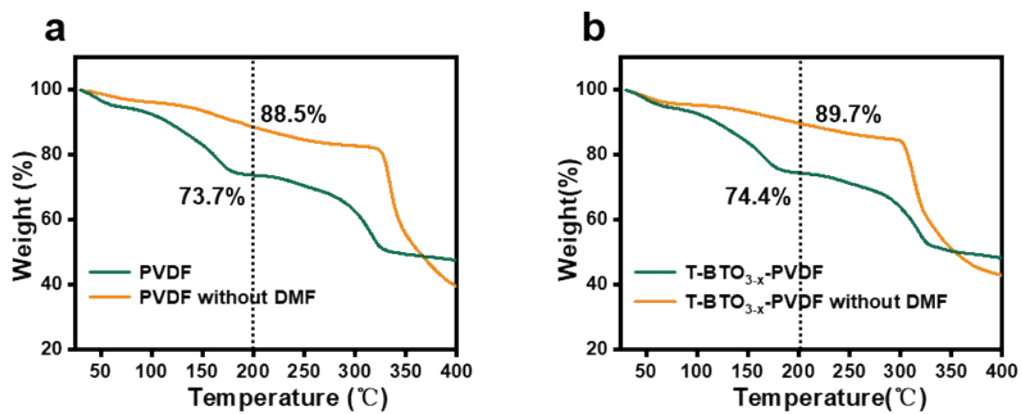

**Fig. S13** TGA curves of a) PVDF, b) T-BTO<sub>3-x</sub>-PVDF electrolytes and their samples without DMF at heating rate of 10 °C min<sup>-1</sup>.

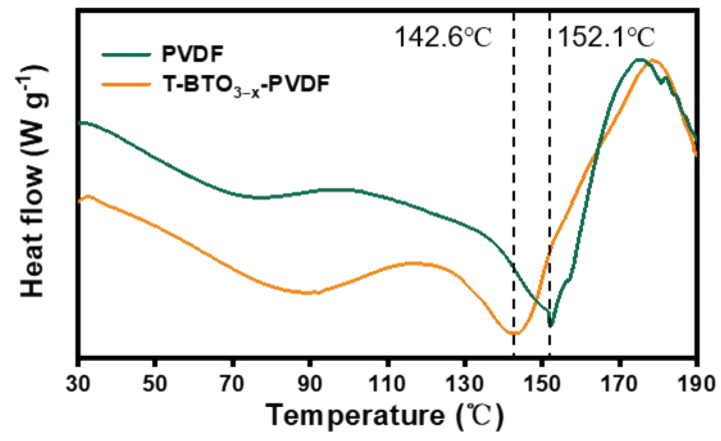

**Fig. S14** DSC curves of PVDF and T-BTO<sub>3-x</sub>-PVDF electrolyte.

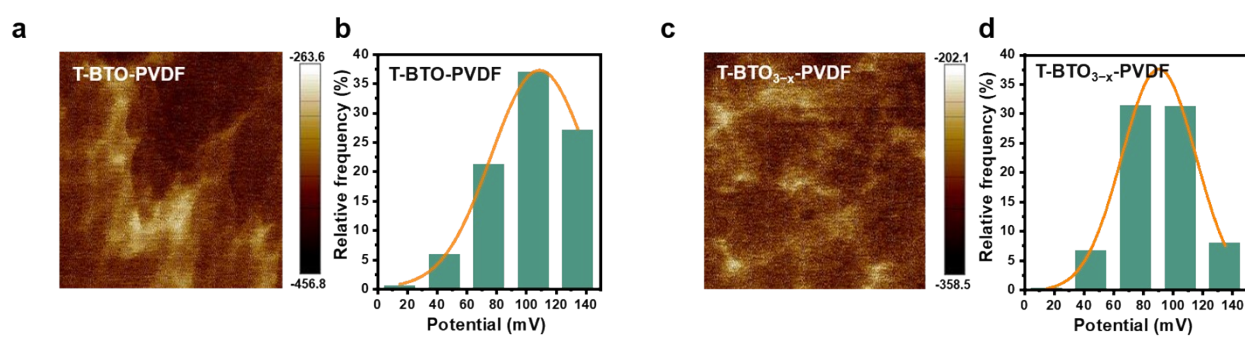

**Fig. S15** Kelvin probe force microscopy interfacial potential images of the a) T-BTO-PVDF and c) T-BTO<sub>3-x</sub>-PVDF electrolytes. Gauss statistic distribution histograms of the interfacial potential for b) T-BTO-PVDF and d) T-BTO<sub>3-x</sub>-PVDF.



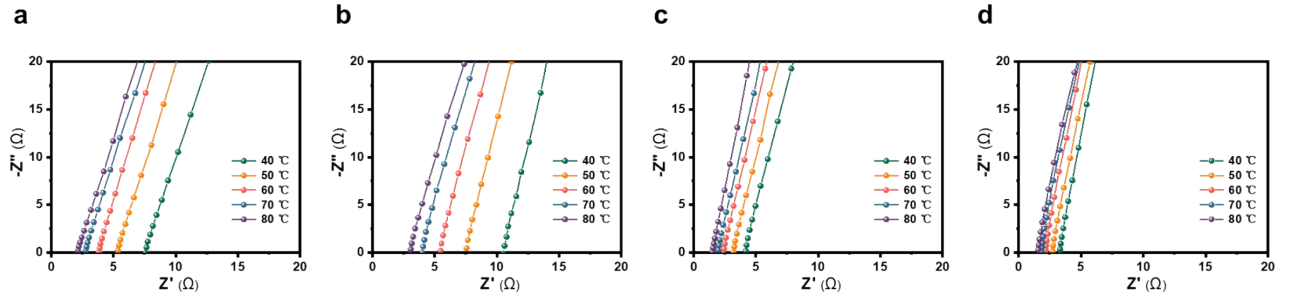

**Fig. S16** Nyquist impedance spectra of stainless steel (SS)||SS batteries with a) PVDF, b) C-BTO-PVDF, c) T-BTO-PVDF and d) T-BTO<sub>3-x</sub>-PVDF at different temperatures.

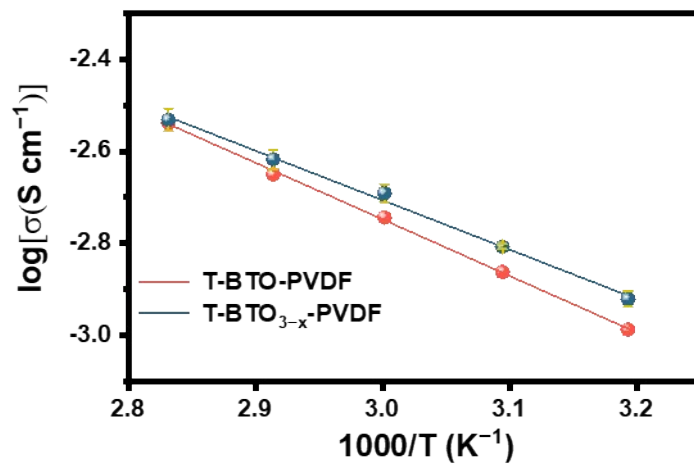

**Fig. S17** Arrhenius plots of the T-BTO<sub>3-x</sub>-PVDF electrolytes with error bar.

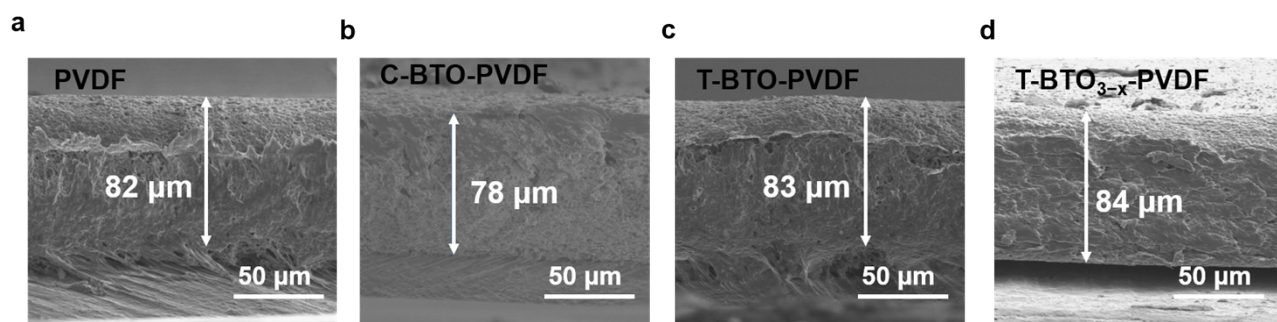

**Fig. S18** Cross section SEM images of a) PVDF, b) C-BTO-PVDF, c) T-BTO-PVDF and d) T-BTO<sub>3-x</sub>-PVDF.

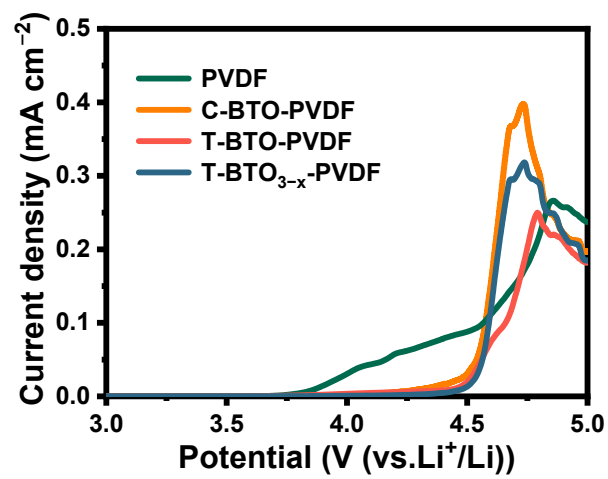

**Fig. S19** LSV curves of SS||Li batteries with different electrolytes.

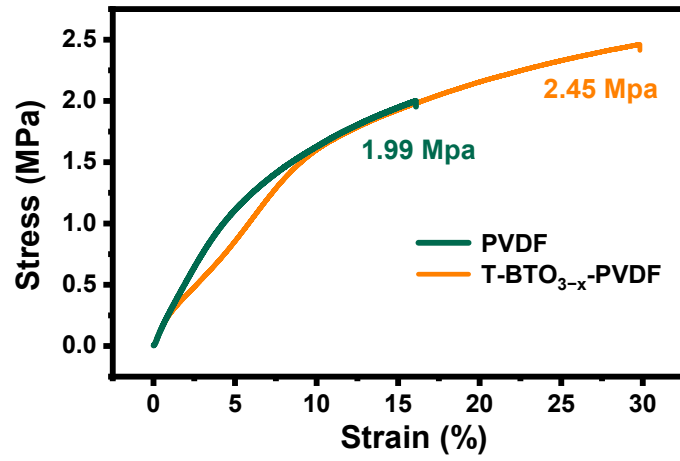

**Fig. S20** Stress-strain curves of PVDF and T-BTO<sub>3-x</sub>-PVDF electrolytes.

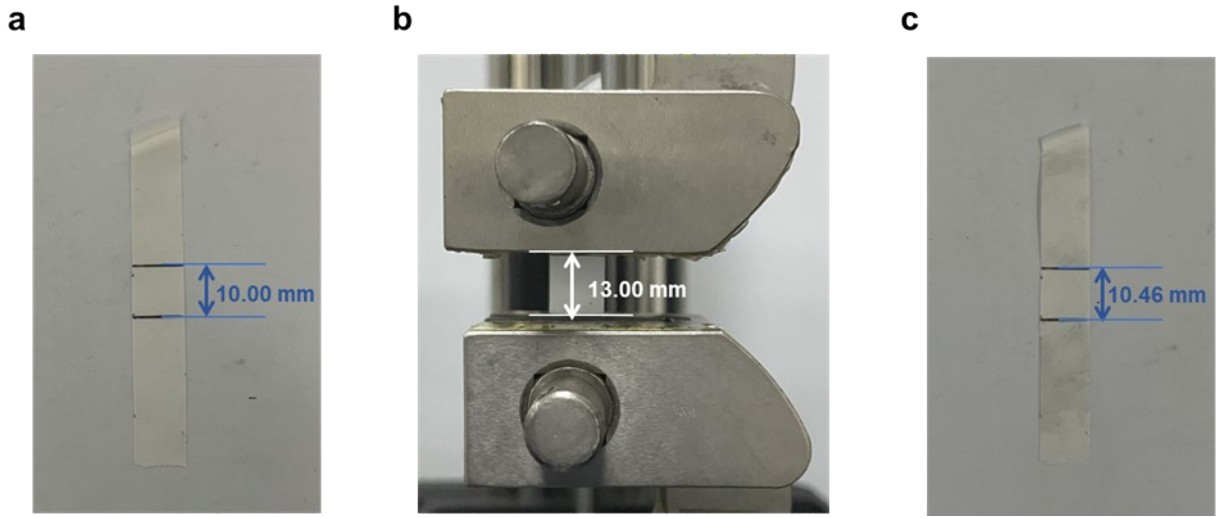

**Fig. S21** The deformation state diagram of tensile test with T-BTO<sub>3-x</sub>-PVDF electrolyte. a) The states before applying tensile force. b) The states of deformation with 30% strain. c) The states after applying tensile force.

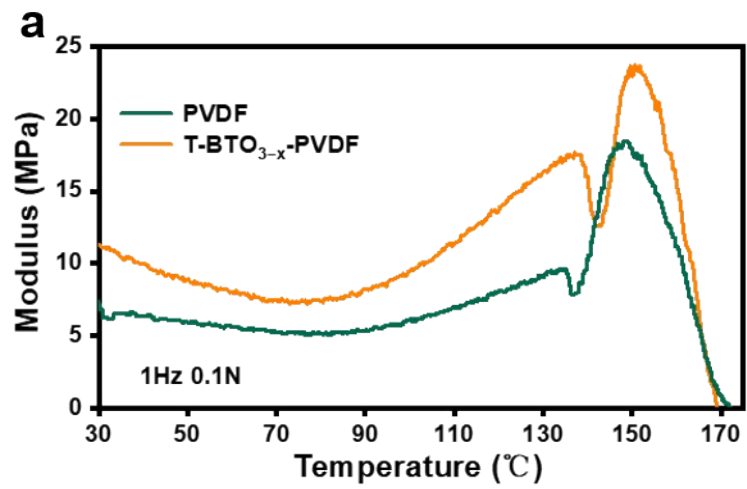

**Fig. S22** Dynamic mechanical analysis (DMA) of PVDF and T-BTO<sub>3-x</sub>-PVDF electrolytes at 1 Hz and 0.1 N.

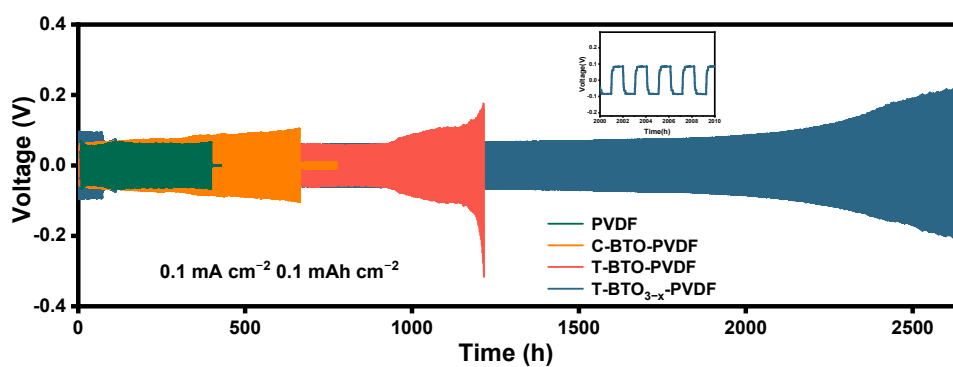

**Fig. S23** Galvanostatic voltage profiles of Li||Li symmetric batteries at  $0.1 \text{ mA cm}^{-2}$  -  $0.1 \text{ mAh cm}^{-2}$  with different electrolytes.



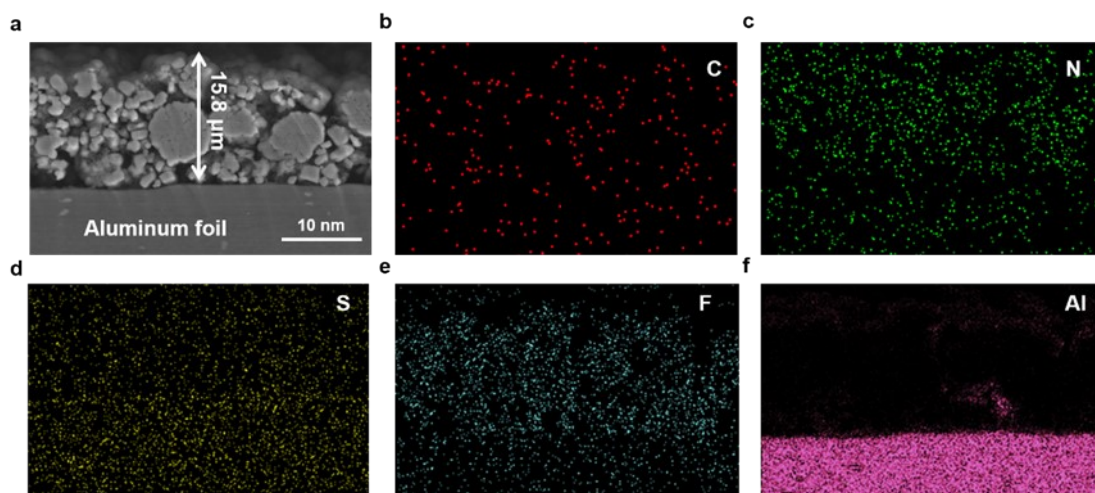

**Fig. S24** a) Cross-sectional SEM images and EDS mappings of uncycled NCM811 cathode with loading of  $\sim 3 \text{ mg cm}^{-2}$  contacted with PVDF electrolyte and EDS mappings of b) C, c) N, d) S, e) F and f) Al elements.

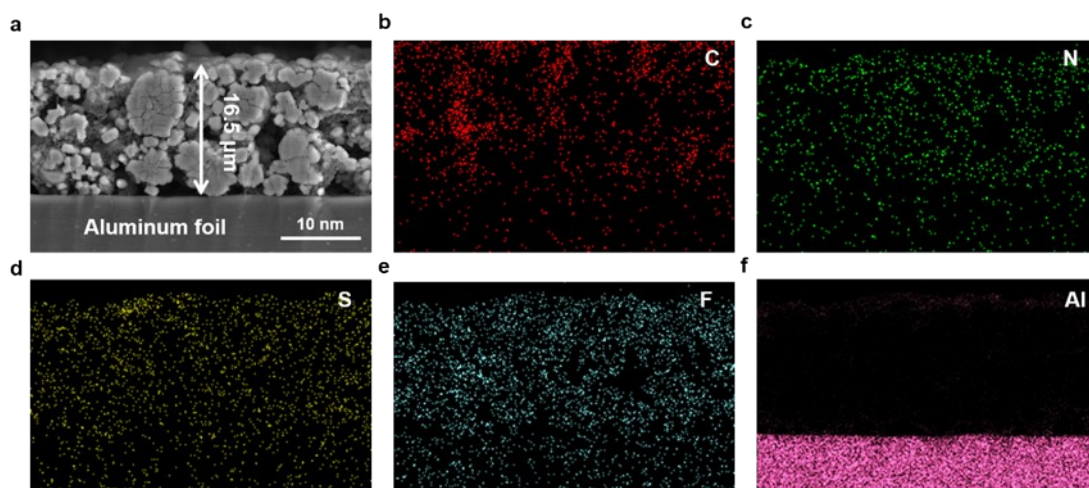

**Fig.S25** a) Cross-sectional SEM images and EDS mappings of uncycled NCM811 cathode with loading of  $\sim 3 \text{ mg cm}^{-2}$  contacted with T-BTO<sub>3-x</sub>-PVDF electrolyte and EDS mappings of b) C, c) N, d) S, e) F and f) Al elements.

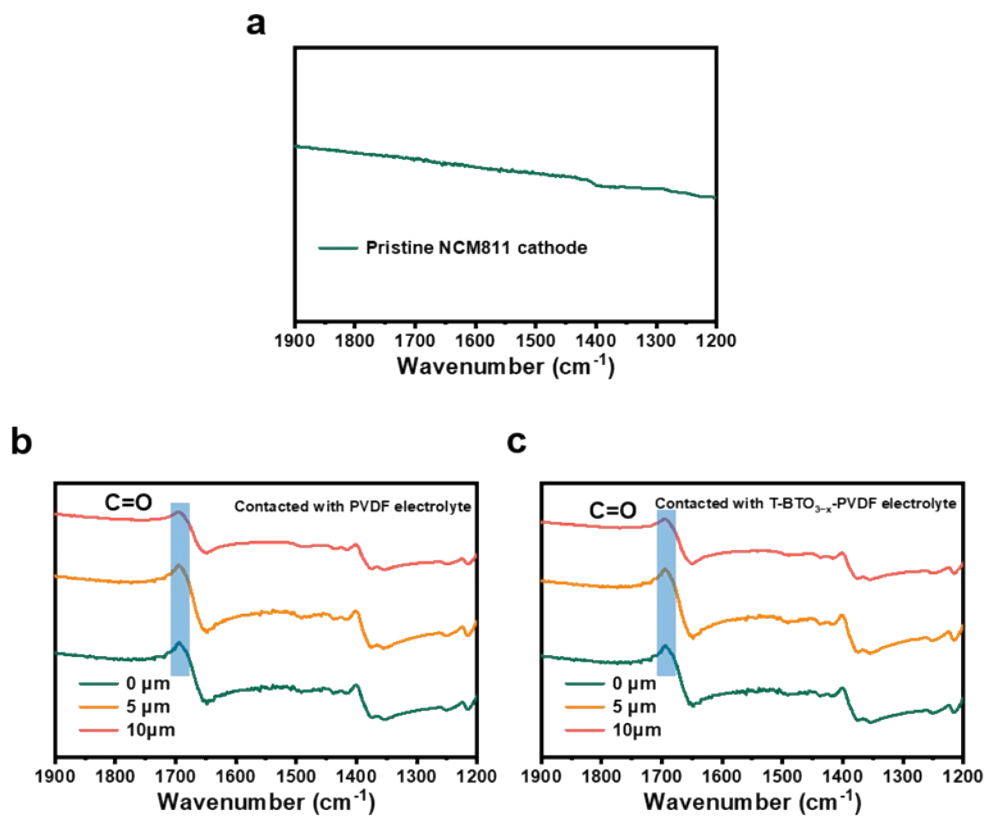

**Fig. S26** FTIR spectra of a) pristine NCM811 cathode with loading of  $3 \text{ mg cm}^{-2}$ , contacted with b) PVDF and c) T-BTO<sub>3-x</sub>-PVDF electrolyte.

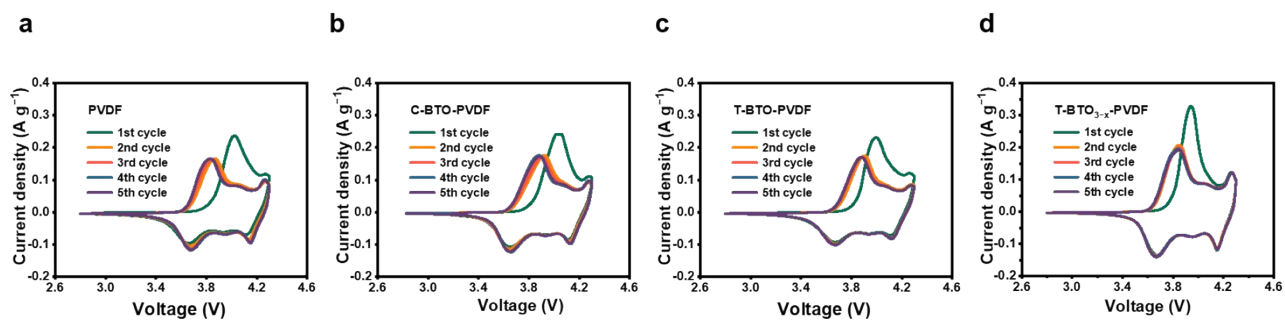

**Fig.S27** Cyclic voltammogram (CV) curves of a) NMC811||PVDF||Li, b) NMC811||C-BTO-PVDF||Li, c) NMC811||T-BTO-PVDF||Li and d) NMC811||T-BTO<sub>3-x</sub>-PVDF||Li.

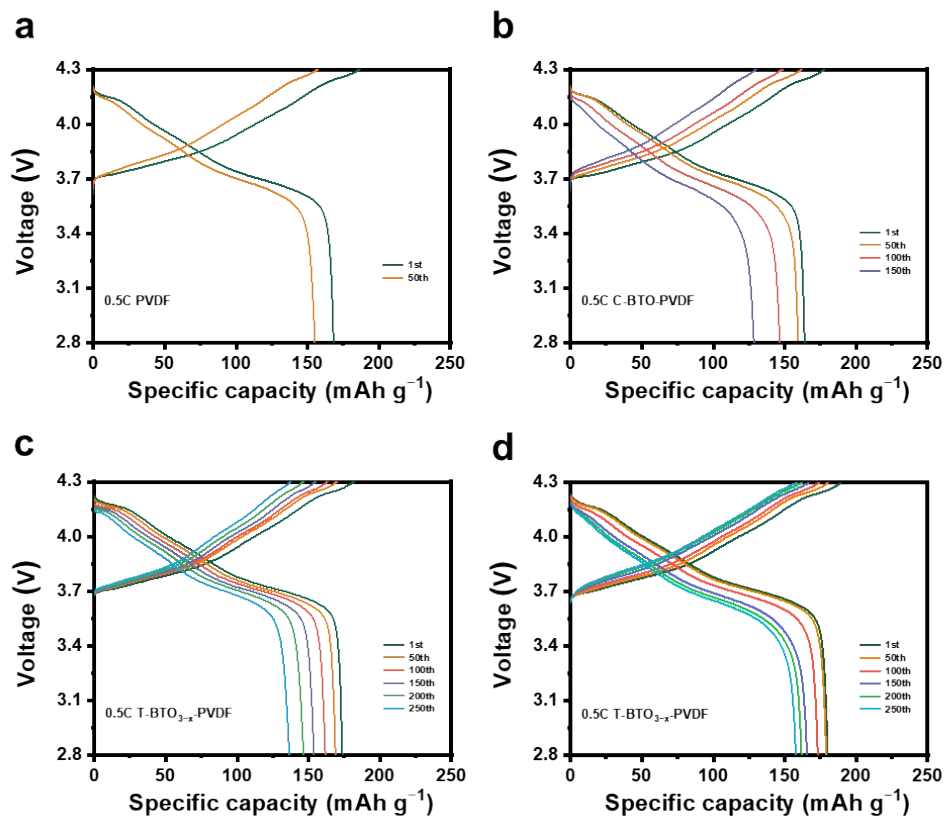

**Fig. S28** Charge–discharge voltage profiles at 0.5 C with a) PVDF, b) C-BTO -PVDF, c) T-BTO -PVDF and d) T-BTO<sub>3-x</sub>-PVDF.

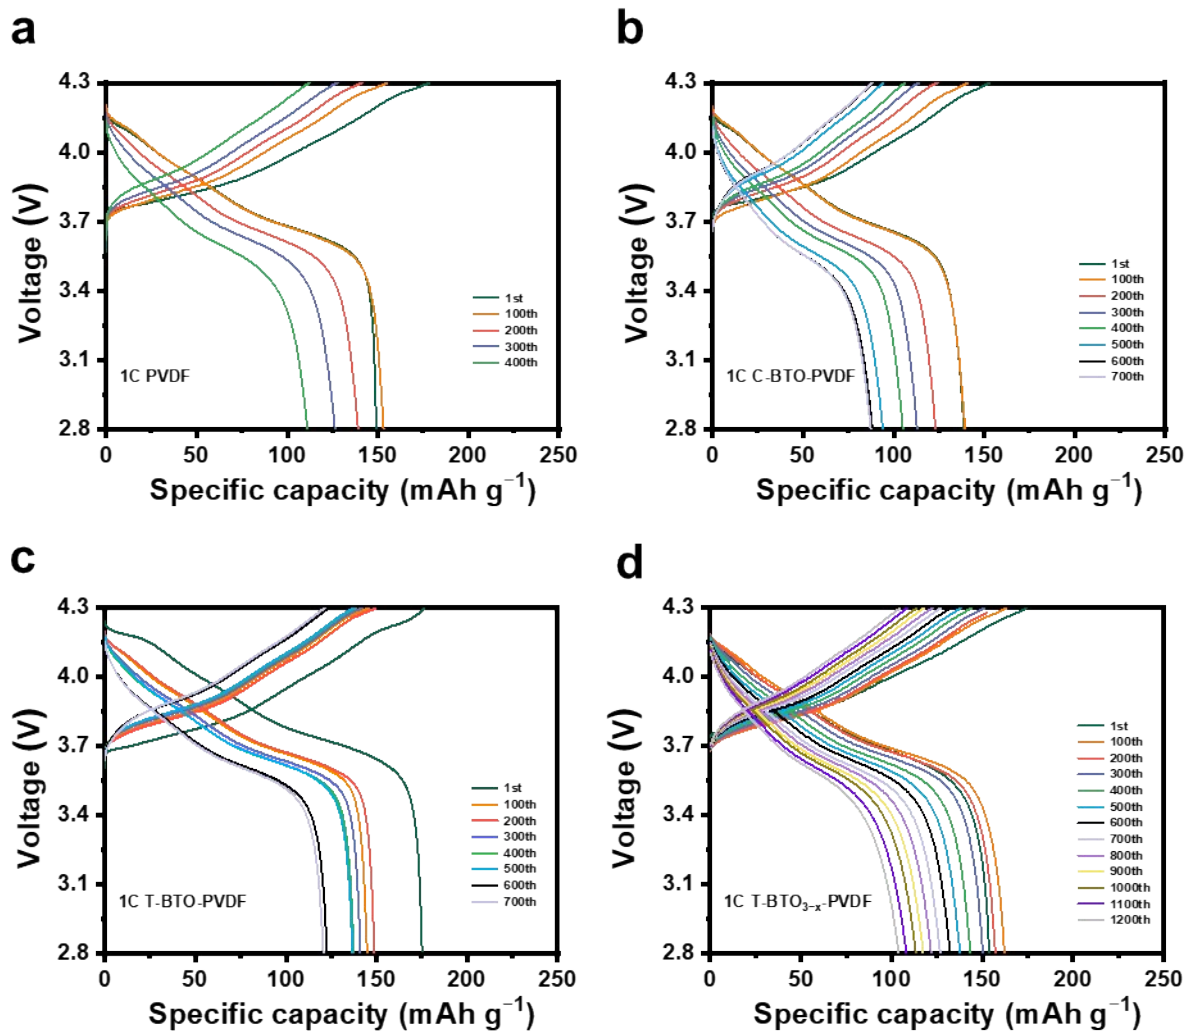

**Fig. S29** Charge-discharge voltage profiles at 1 C with a) PVDF, b) C-BTO -PVDF, c) T-BTO -PVDF and d) T-BTO<sub>3-x</sub>-PVDF.

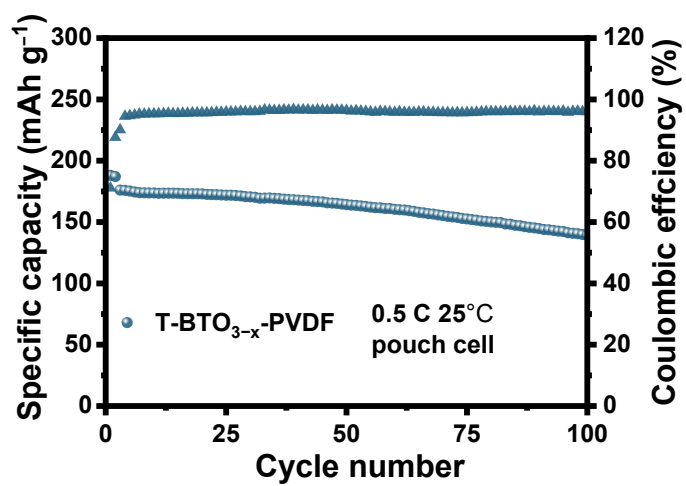

**Fig. S30** Cycling performance of NCM811||T-BTO<sub>3-x</sub>-PVDF||Li pouch cell at 0.5 C at 25 °C.

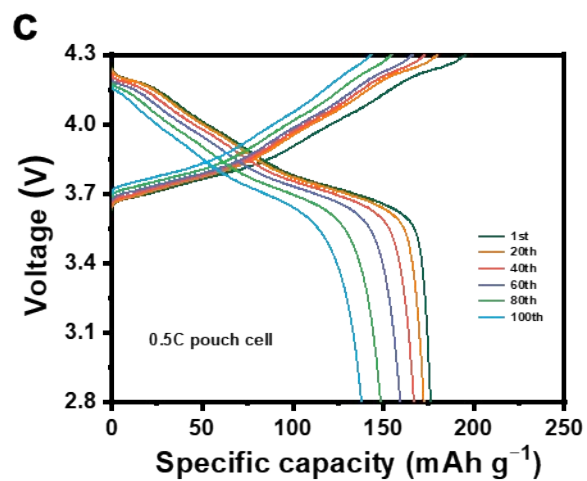

**Fig. S31** Charge–discharge voltage profiles of pouch cell at 0.5 C with T-BTO<sub>3-x</sub>-PVDF.



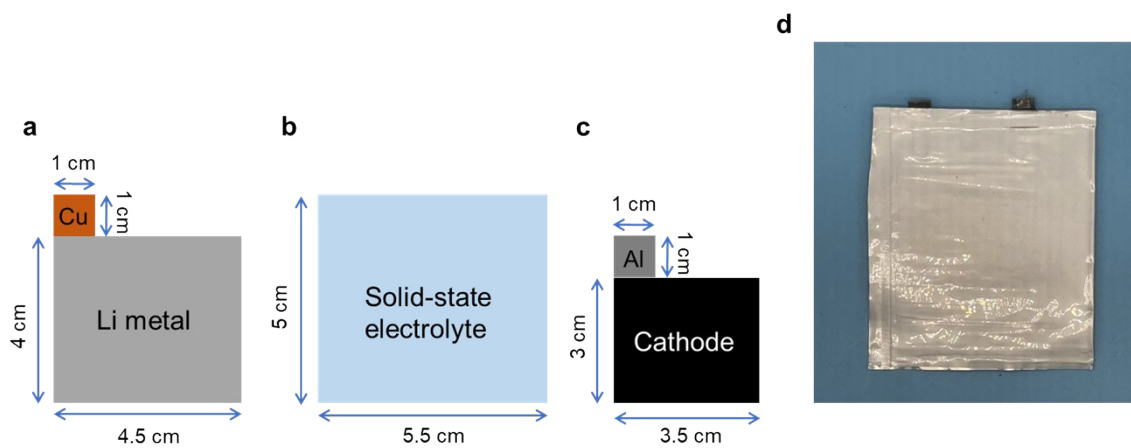

**Fig. S32** Schematic diagram of each component of a solid-state pouch battery: a) lithium anode, b) solid-state electrolyte, c) NCM811 cathode. d) pouch battery with T-BTO<sub>3-x</sub>-PVDF electrolyte.

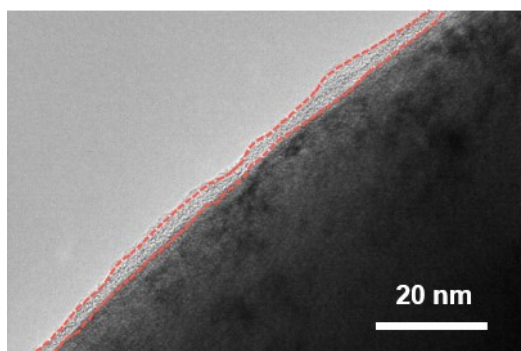

**Fig. S33** TEM images of cycled NCM811 particle matching with T-BTO-PVDF.

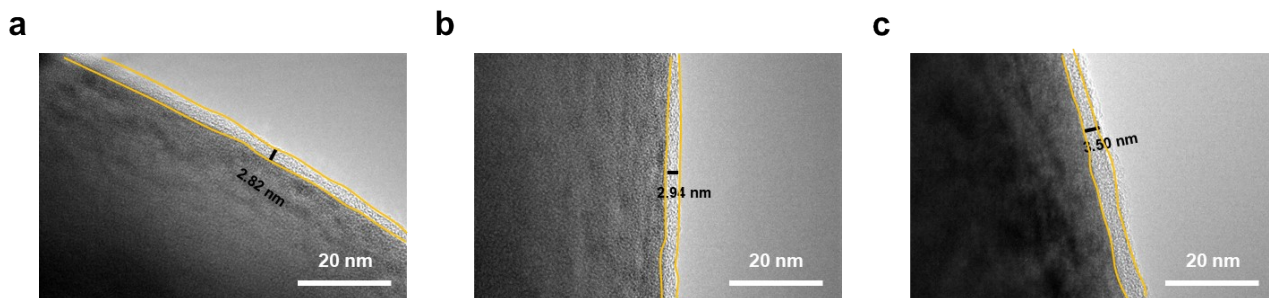

**Fig. S34** TEM images of cycled NCM811 particles which are collected in the vicinity of T-BTO.

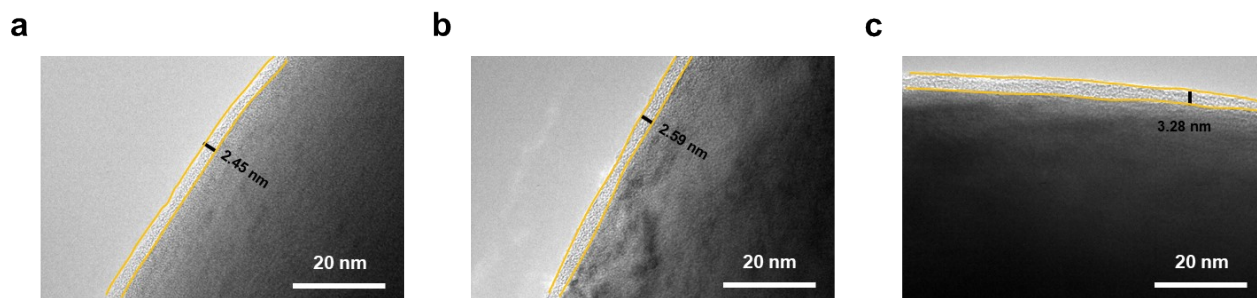

**Fig. S35** TEM images of cycled NCM811 particles which are near the current collector.

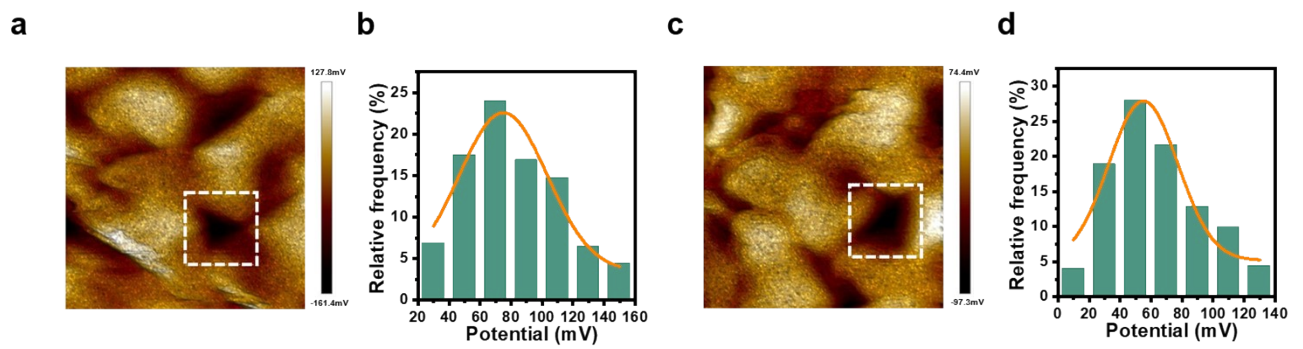

**Fig. S36** Kelvin probe force microscopy interfacial potential images of the a) PVDF-NCM811 and c) (T-BTO<sub>3-x</sub>-PVDF)-NCM811. Gauss statistic distribution histograms of the interfacial potential for b) PVDF-NCM811 and d) (T-BTO<sub>3-x</sub>-PVDF)-NCM811.

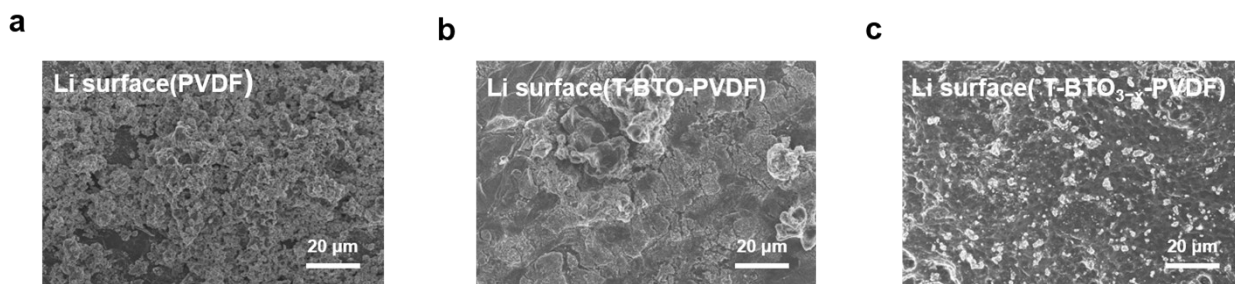

**Fig. S37** SEM images of lithium metal surface after cycling 100 h at 0.2 mA cm<sup>-2</sup> using a) PVDF, b) T-BTO-PVDF and c) T-BTO<sub>3-x</sub>-PVDF.

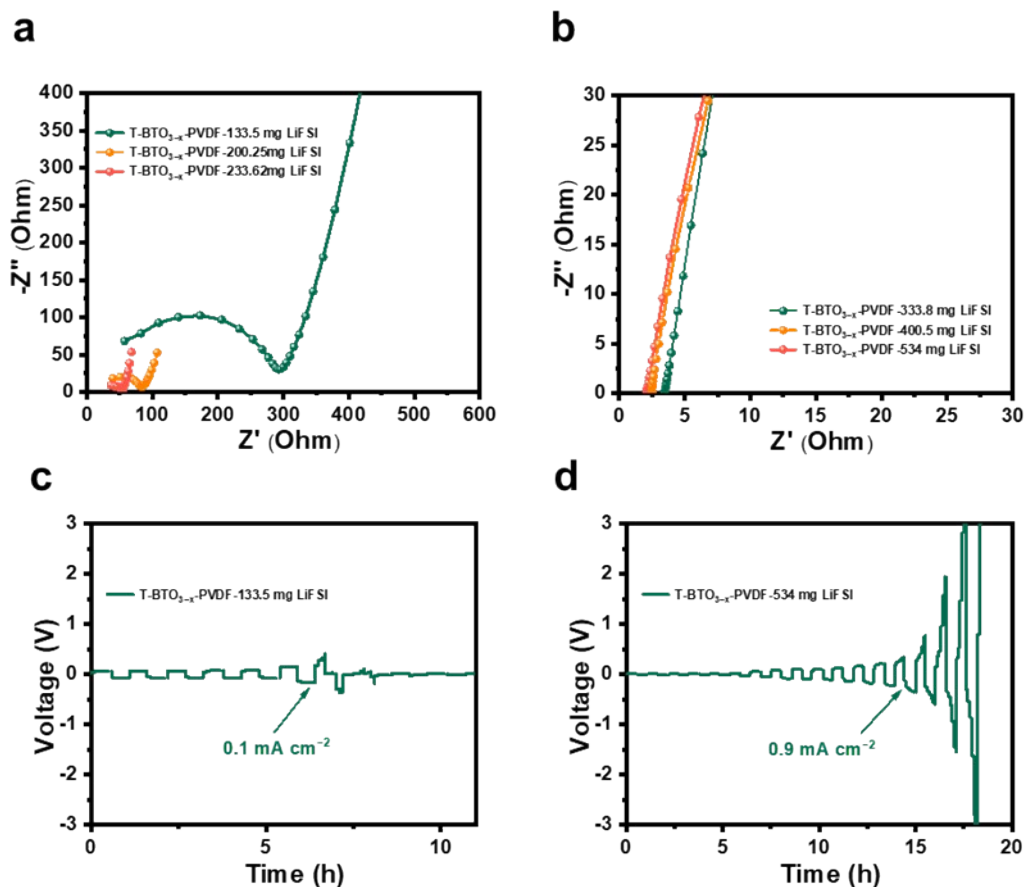

**Fig. S38** Influence of lithium salt content on the electrochemical performance of T-BTO<sub>3-x</sub>-PVDF electrolyte. The Nyquist impedance spectra of T-BTO<sub>3-x</sub>-PVDF electrolyte with a) lower lithium salt content and b) higher lithium salt content. CCD of Li||Li symmetric battery using T-BTO<sub>3-x</sub>-PVDF electrolyte with (c) lower lithium salt content and (d) higher lithium salt content.

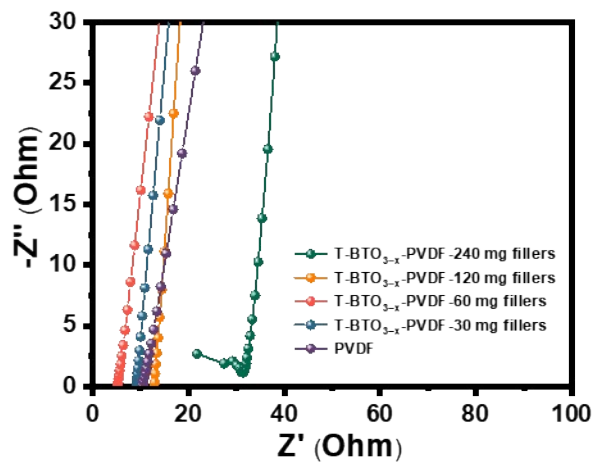

**Fig. S39** The Nyquist impedance spectra of T-BTO<sub>3-x</sub>-PVDF electrolyte with different filler content.



**Table. S1** Transference number and dissociation degree of PVDF-based solid-state electrolytes.

| <b>Electrolytes</b>                                                                                           | <b>Transference number</b> | <b>Free Li<sup>+</sup></b> | <b>References</b>                                          |
|---------------------------------------------------------------------------------------------------------------|----------------------------|----------------------------|------------------------------------------------------------|
| PVDF/LiFSI/Coupled BaTiO <sub>3</sub> -Li <sub>0.33</sub> La <sub>0.56</sub> TiO <sub>3-x</sub> nanowires     | 0.57                       | 64%                        | <i>Nat. Nanotechnol.</i> , 2023, 18, 602–610               |
| <b>This work</b>                                                                                              | <b>0.52</b>                | <b>72%</b>                 | /                                                          |
| PVDF/LiTFSI/100wt% Li <sub>6.75</sub> La <sub>3</sub> Zr <sub>1.75</sub> - Ta <sub>0.25</sub> O <sub>12</sub> | 0.51                       | /                          | <i>Energy Storage Mater.</i> , 2020, 26, 283-289           |
| PVDF/LiFSI/NaNbO <sub>3</sub>                                                                                 | 0.49                       | 38%                        | <i>Adv. Mater.</i> , 2023, 2311195                         |
| P(VDF-TrFE-CTFE)/LiTFSI                                                                                       | 0.33                       | /                          | <i>Energy Environ. Sci.</i> , 2021, 14, 6021               |
| PVDF/LiTFSI/8wt% polybenzimidazole                                                                            | 0.49                       | /                          | <i>InfoMat</i> , 2022, 4, e12247                           |
| PVDF/LiFSI/26 wt%/lithium phenyl phosphate                                                                    | 0.47                       | /                          | <i>Energy Environ. Sci.</i> , 2022, 48, 375-383            |
| PVDF/LiTFSI/15wt% Li <sub>3</sub> InCl <sub>6</sub>                                                           | 0.45                       | /                          | <i>J. Alloys Compd.</i> , 2023, 969, 172418                |
| PVDF/LiTFSI/10%LLZO-10%SN                                                                                     | 0.39                       | /                          | <i>ACS Appl. Mater. Interfaces</i> , 2023, 15, 37422–37432 |
| PVDF/LiTFSI/20wt% PZT                                                                                         | 0.37                       | /                          | <i>ACS Nano</i> , 2023, 17, 14114–14122                    |
| PVDF/LiFSI/15wt%LiTaO <sub>3</sub>                                                                            | 0.33                       | /                          | <i>Energy Mater. Devices</i> , 2023, <u>1</u> (1), 9370004 |

**Table S2.** The deformation state of PVDF and T-BTO<sub>3-x</sub>-PVDF electrolytes.

|                            | <b>Initial length</b> | <b>Tensile length<br/>(stain 30%)</b> | <b>Recovery<br/>length</b> | <b>Deformation<br/>contribution of<br/>Elastic<br/>deformation</b> |
|----------------------------|-----------------------|---------------------------------------|----------------------------|--------------------------------------------------------------------|
| T-BTO <sub>3-x</sub> -PVDF | 10 mm                 | 13 mm                                 | 10.46 mm                   | ~85%                                                               |

**Note S1: Preparing samples for  $\epsilon_r$  and PFM.**

The testing of  $\epsilon_r$  and PFM requires the samples to be free-standing and uniformly thin.

Additionally, in order to stimulate the environment in the electrolyte, we selected PVDF without lithium salt as supporting agent. 400mg dry PVDF powders ( $M_w=300,000$ , Kynar, 761) without LiFSI was added into 15 ml DMF. Stirring the solution until the PVDF powders were dissolved completely. Then, 15 wt% fillers were added into the solution to slurry 2h and ultrasonic processing 30 min. The obtained solution was poured into petri dish at 55 °C for 30h.

**Note S2: Preparing samples for potential between NCM811 and electrolytes.**

200 mg dry PVDF powders ( $M_w=300,000$ , Kynar, 761) were added into 4.14ml NMP. Stirring the solution until the PVDF powders were dissolved completely. Then, the 30 mg (15 wt% of PVDF) fillers and 800mg NCM811 particles were added into the solution to slurry 5 h. The obtained solution was applied onto the Al foil by a 60  $\mu\text{m}$  scraper. Dry in 80 °C for 1h.
